# Supplementary material
Source: PubMed Central journal article supplement (PMC5055420)
Supplement: NIHMS786615-supplement-Supplementary_Figure_2.pdf [file NIHMS786615-supplement-Supplementary_Figure_2.pdf]

**Figure 6**

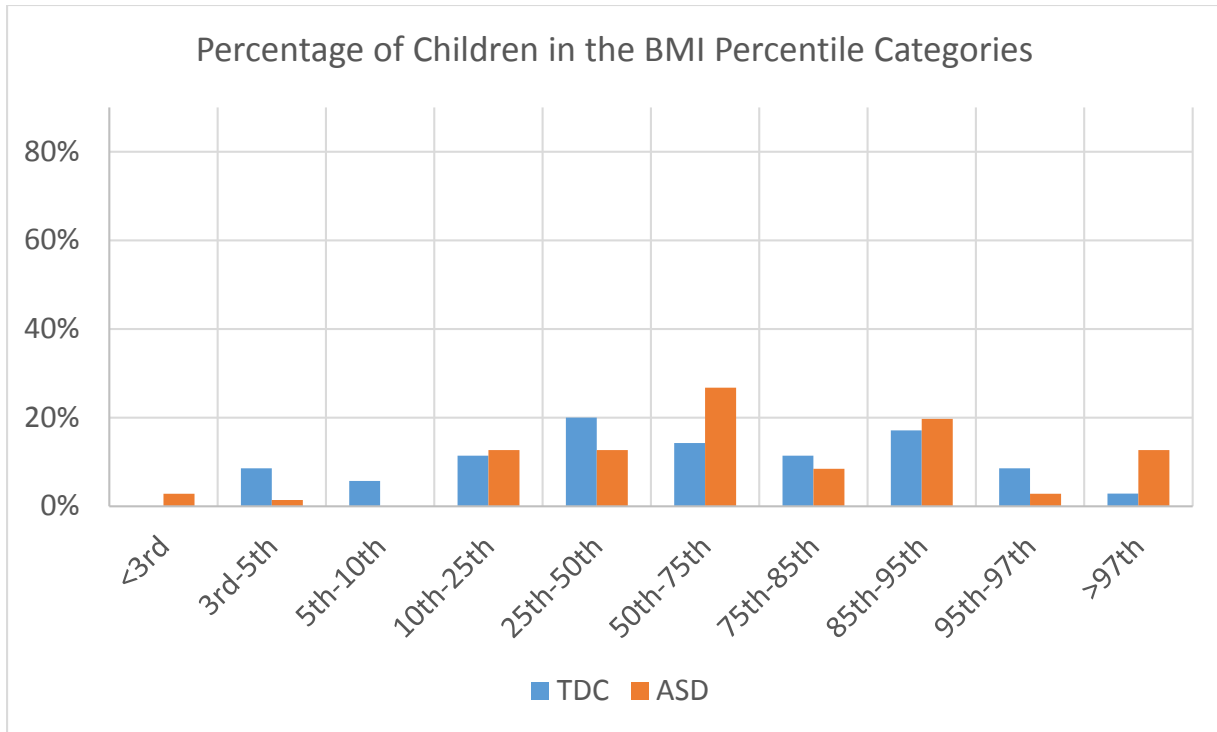

Body mass index (BMI) reported in reference to Center for Disease Control (CDC) BMI percentiles for children two to 20 years of age in the autism spectrum disorder (ASD) and typically developing control (TDC) groups. The two groups had similar distributions in terms of percentile BMI, although there appeared to be more extreme BMI's (both on the low and high end) in the individuals with ASD. The groupings had n's that were too small to perform Chi-Square analyses. Note that in Table 1, there are no significant group differences in raw BMI scores.
